# Supplementary material for: Preparation of reduced graphene oxide/Cu nanoparticle composites through electrophoretic deposition: application for nonenzymatic glucose sensing
Source: Royal Society of Chemistry journal article supplement (doi:10.1039/c4ra14132f), 2015-01-01
Supplement: c4ra14132f1.pdf [file c4ra14132f1.pdf]

## Supplementary Information

### Preparation of reduced graphene oxide-Cu nanoparticle composites through electrophoretic deposition: Application for nonenzymatic glucose sensing

Qian Wang, Qi Wang, Musen Li, Sabine Szunerits and Rabah Boukherroub

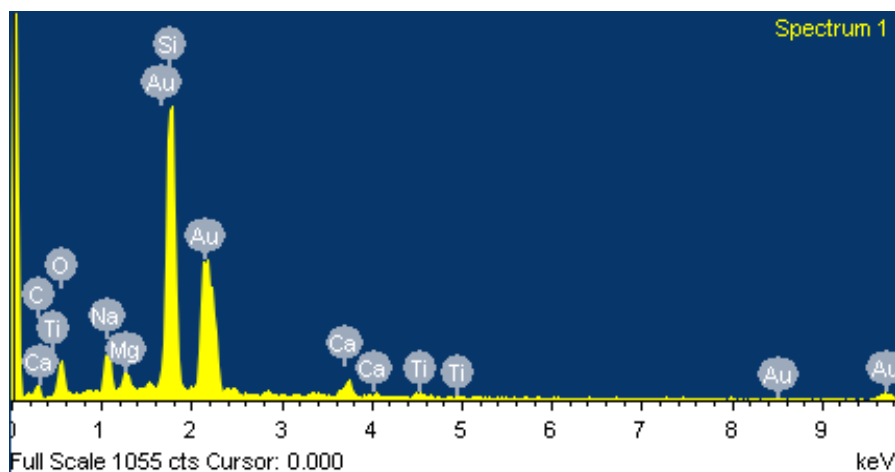

| Element | Weight% | Atomic% |
|---------|---------|---------|
| C K     | 6.06    | 19.76   |
| O K     | 10.71   | 26.20   |
| Na K    | 4.28    | 7.28    |
| Mg K    | 1.34    | 2.15    |
| Si K    | 22.23   | 30.98   |
| Ca K    | 2.60    | 2.54    |
| Ti K    | 0.98    | 0.80    |
| Au M    | 51.82   | 10.30   |

**Figure S1:** EDX results of rGO deposited by EPD technique using 0.5 mg/mL of GO in ethanol. Applied voltage: 50 V; deposition time = 2 min.

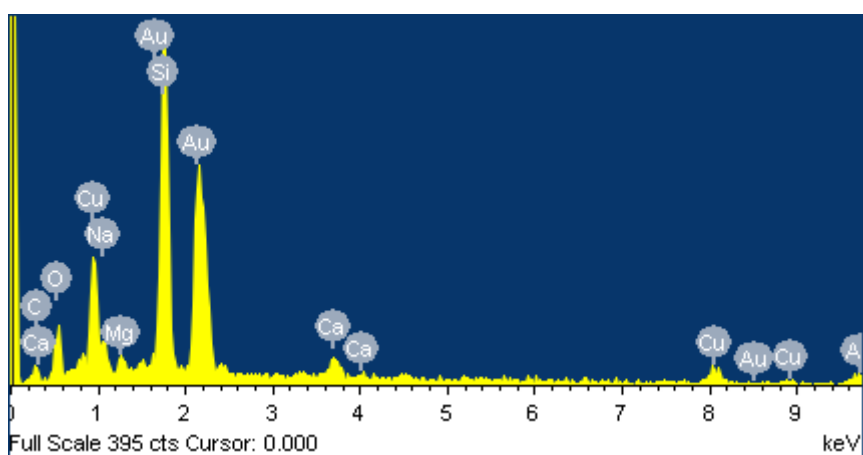

| Element     | Weight% | Atomic% |
|-------------|---------|---------|
| <b>C K</b>  | 6.07    | 21.40   |
| <b>O K</b>  | 9.15    | 24.21   |
| <b>Na K</b> | 2.02    | 3.73    |
| <b>Mg K</b> | 0.99    | 1.72    |
| <b>Si K</b> | 16.49   | 24.85   |
| <b>Ca K</b> | 2.32    | 2.45    |
| <b>Cu L</b> | 17.95   | 11.96   |
| <b>Au M</b> | 45.02   | 9.68    |

**Figure S2.** EDX analysis of rGO/CuNPs deposited by EPD technique using 0.5 mg/mL of GO and 0.5 mg/mL of CuSO<sub>4</sub> in ethanol. Applied voltage: 50 V; deposition time = 2 min.

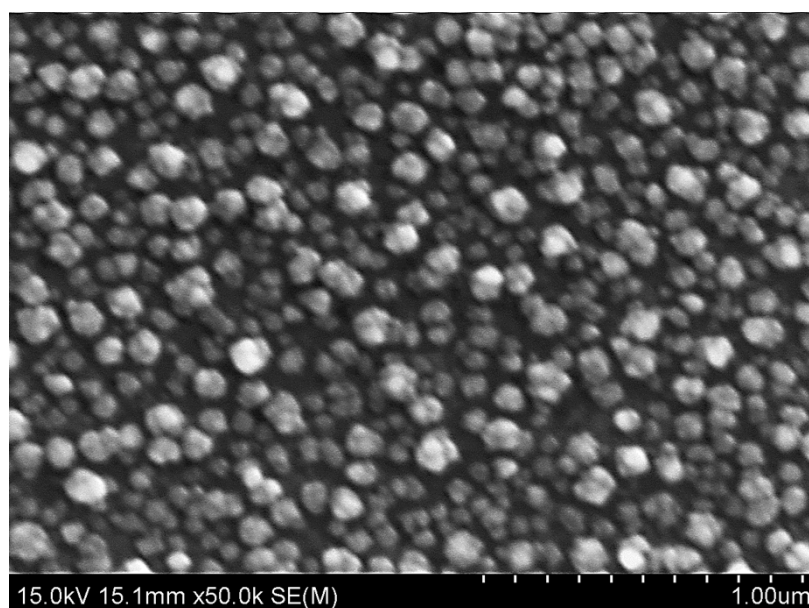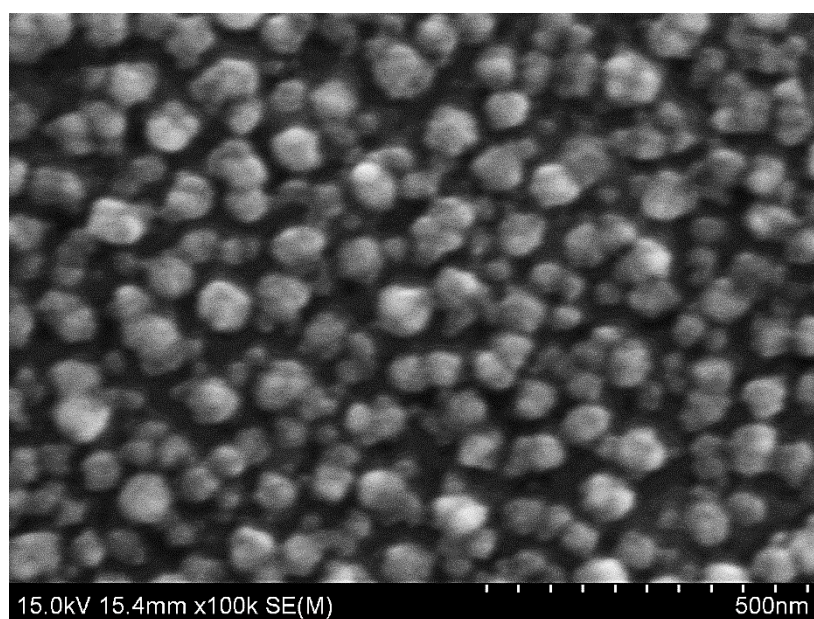

**Figure S3.** SEM images of rGO/Cu NPs deposited by EPD technique using 0.5 mg/mL of GO and 0.5 mg/mL of CuSO<sub>4</sub> in ethanol. Applied voltage: 50 V; deposition time = 1 min.

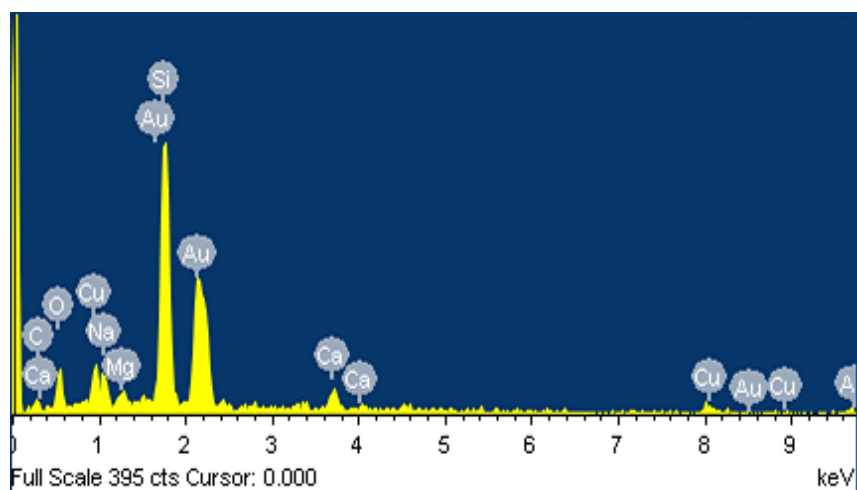

| Element | Weight% | Atomic% |
|---------|---------|---------|
| C K     | 6.01    | 19.84   |
| O K     | 10.90   | 27.02   |
| Na K    | 2.49    | 4.29    |
| Mg K    | 1.2     | 1.96    |
| Si K    | 20.30   | 28.66   |
| Ca K    | 3.12    | 3.09    |
| Cu L    | 9.17    | 5.72    |
| Au M    | 46.81   | 9.42    |

**Figure S4.** EDX results of rGO/Cu NPs deposited by EPD technique using 0.5 mg/mL of GO and 0.5 mg/mL of CuSO<sub>4</sub> in ethanol. Applied voltage: 50 V; deposition time = 1 min.

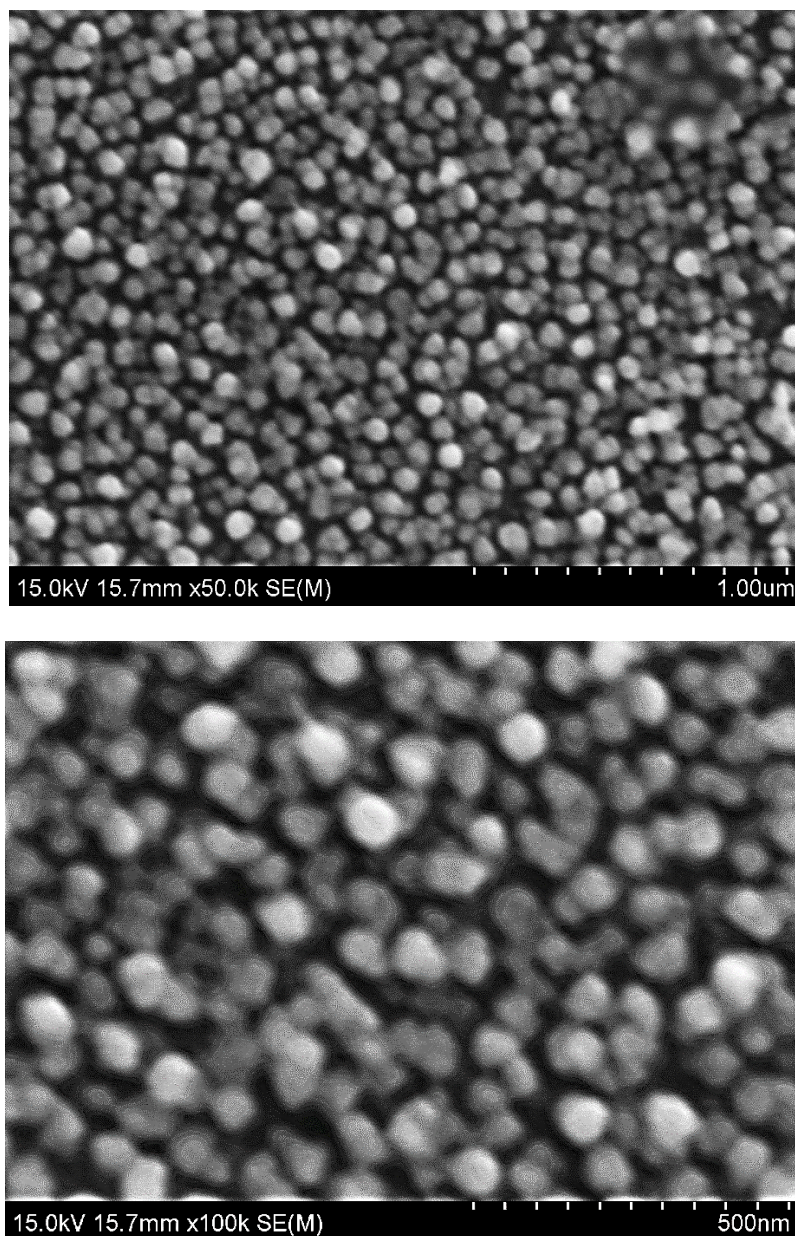

**Figure S5.** SEM images of rGO/Cu NPs deposited by EPD technique using 0.5 mg/mL of GO and 0.5 mg/mL of CuSO<sub>4</sub> in ethanol. Applied voltage: 50 V; deposition time = 3 min.

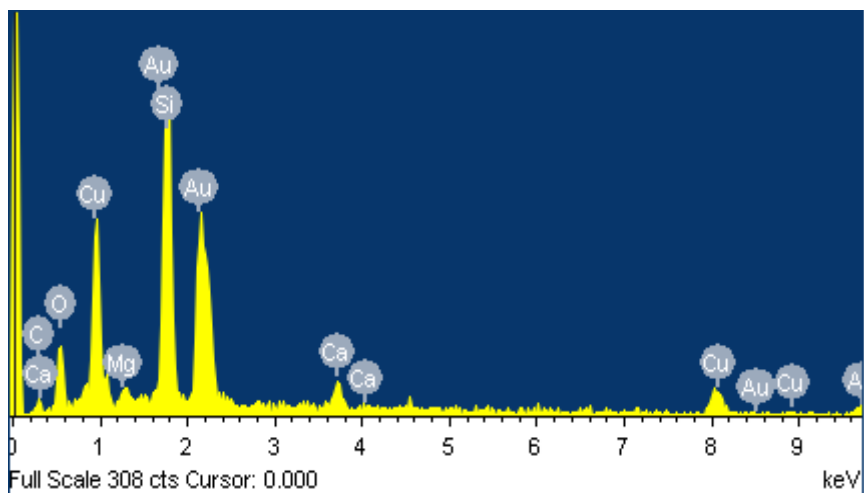

| Element | Weight% | Atomic% |
|---------|---------|---------|
| C K     | 5.03    | 18.05   |
| O K     | 9.94    | 26.80   |
| Mg K    | 0.94    | 1.67    |
| Si K    | 16.66   | 25.60   |
| Ca K    | 2.36    | 2.54    |
| Cu L    | 24.08   | 16.35   |
| Au M    | 40.99   | 8.98    |

**Figure S6.** EDX results of rGO/Cu NPs deposited by EPD technique using 0.5 mg/mL of GO and 0.5 mg/mL of CuSO<sub>4</sub> in ethanol. Applied voltage: 50 V; deposition time = 3 min.

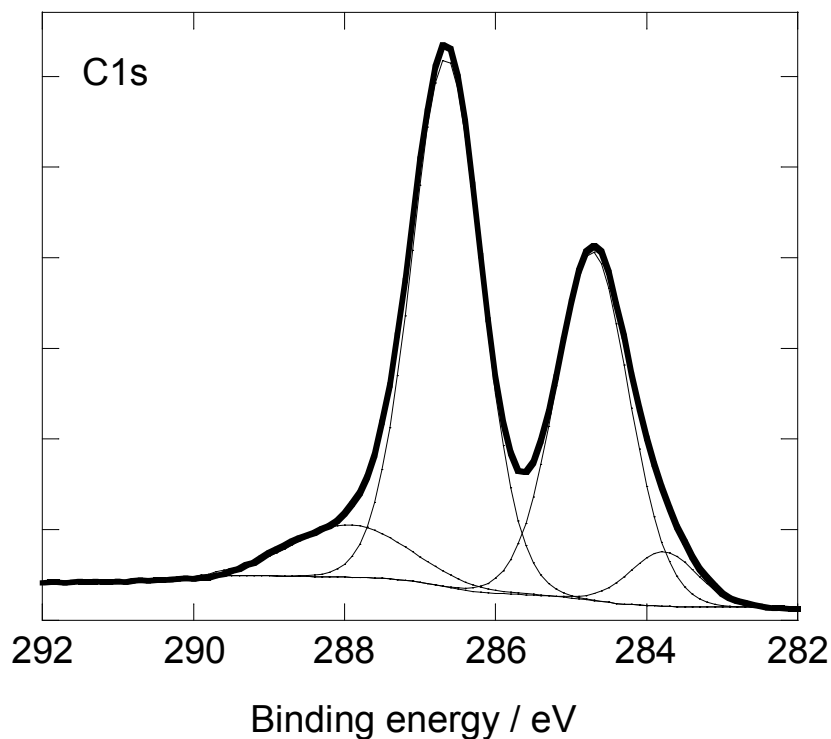

**Figure S7.** C1s high resolution X-ray photoelectron spectroscopy (XPS) of graphene oxide (GO).

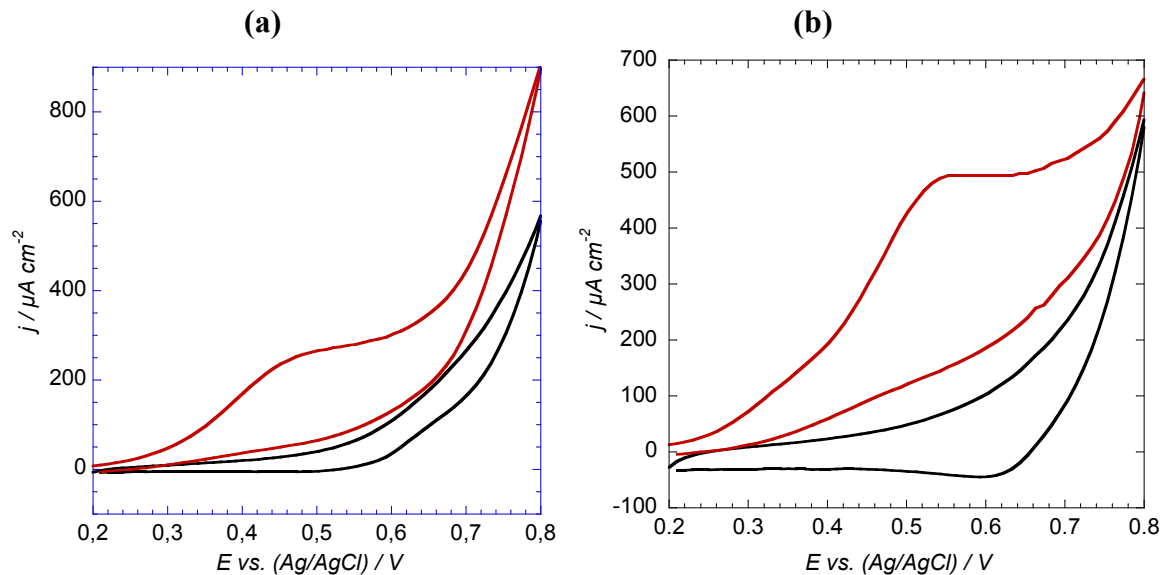

**Figure S8:** Cyclic voltammograms of (A) Cu NPs modified gold electrodes and (B) rGO/Cu NPs modified electrodes in 0.1 M NaOH before (black) and after addition of 1 mM glucose (red), scan rate:  $50 \text{ mV s}^{-1}$ . EDP using  $0.5 \text{ mg mL}^{-1}$  of  $\text{CuSO}_4$  (a) and  $0.5 \text{ mg mL}^{-1}$  of GO/ $0.5 \text{ mg mL}^{-1}$  of  $\text{CuSO}_4$  in ethanol (b). Applied voltage: 50 V; deposition time = 2 min.

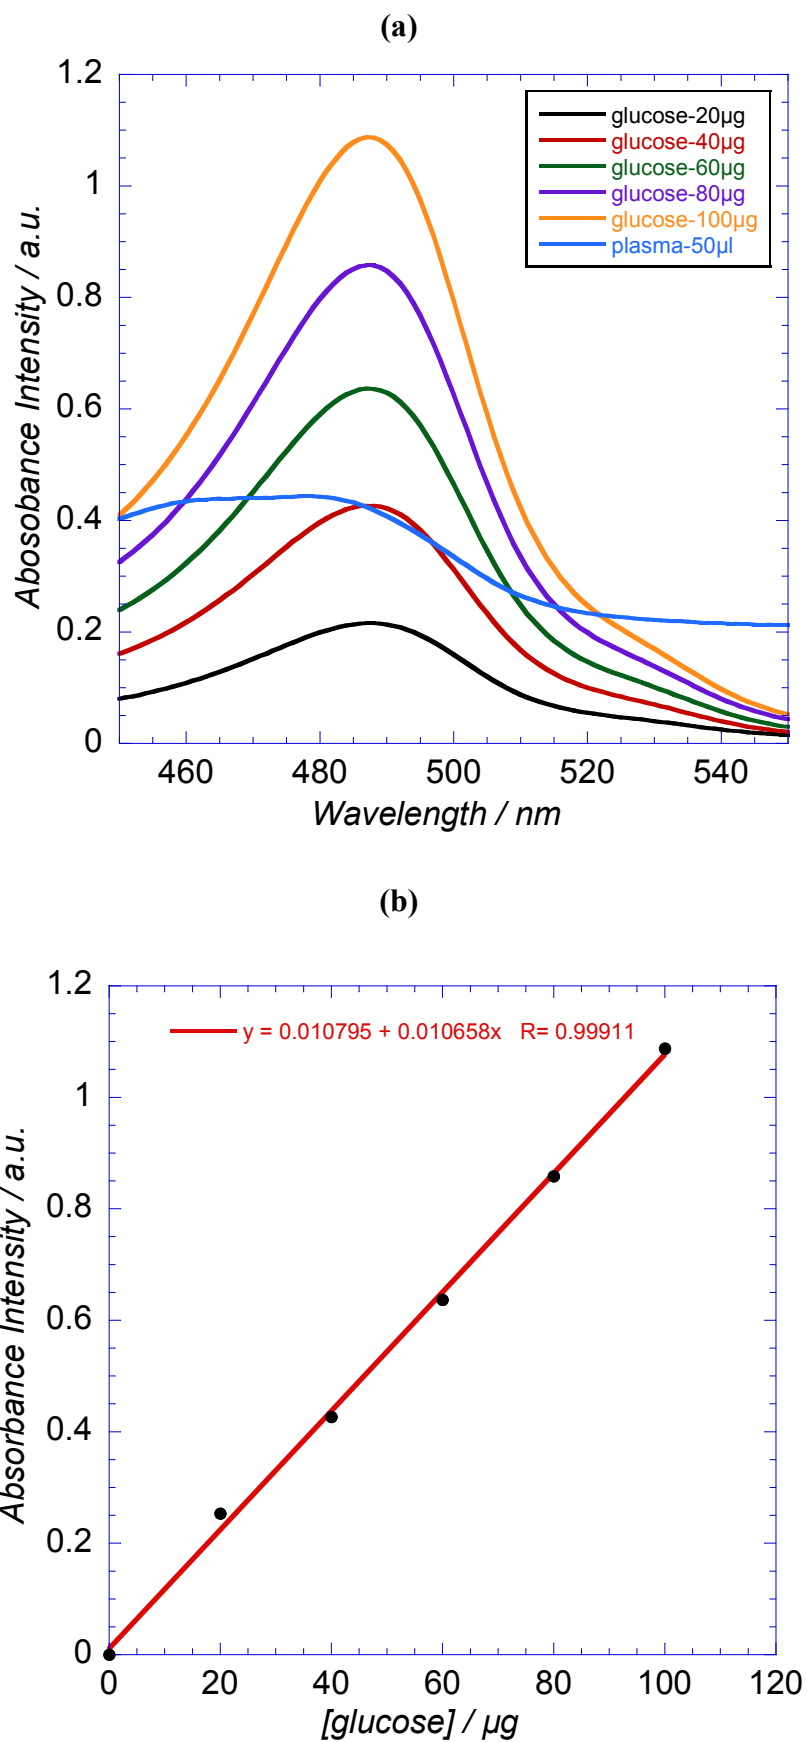

**Figure S9:** Determination of glucose using the well-established phenol-sulphuric acid colorimetric method.
